# Supplementary material for: A SAR and QSAR study on cyclin dependent kinase 4 inhibitors using machine learning methods
Source: Royal Society of Chemistry journal article supplement (doi:10.1039/d2dd00143h), 2023-01-01
Supplement: d2dd00143h1.pdf [file d2dd00143h1.pdf]

# SAR and QASR study on Cyclin dependent kinase 4 inhibitors using machine learning methods

*Xiaoyang Pang<sup>a</sup>, Yunyang Zhao<sup>a</sup>, Guo Li<sup>a</sup>, Jianrong Liu<sup>\*b</sup>, Aixia Yan<sup>\*a</sup>*

<sup>a</sup>State Key Laboratory of Chemical Resource Engineering, Department of Pharmaceutical Engineering, Beijing University of Chemical Technology, Beijing, P. R. China.

<sup>b</sup>BUCT-Paris Curie Engineer School, Beijing University of Chemical Technology, Beijing 100029, P. R. China.

|                    |                                                    |
|--------------------|----------------------------------------------------|
| Table S1           | The evaluation of generated decoys                 |
| Table S2           | The optimal hyperparameters of RF models           |
| Table S3           | The optimal hyperparameters of SVM models          |
| Table S4           | The optimal hyperparameters of DNN models          |
| Figure S1          | The chemical space of training set and test set.   |
| References S1-S250 | 250 references for collecting 3018 CDK4 inhibitors |

\*Corresponding author. Telephone: +86-10-64421335. Fax: +86-10-64416428.

E-mail: [yanax@mail.buct.edu.cn](mailto:yanax@mail.buct.edu.cn), [liujianrong2017@126.com](mailto:liujianrong2017@126.com).

---

Table S1 The evaluation of generated decoys

| Training set/Test set | Molecular Num <sup>a</sup> | Decoys                 |                  | DOE score | Average Doppelganger score |
|-----------------------|----------------------------|------------------------|------------------|-----------|----------------------------|
|                       |                            | Method                 | Num <sup>b</sup> |           |                            |
| Training set 1        | 2266                       | Deepcoy                | 5995             | 0.039     | 0.214                      |
| Test set 1            | 752                        | MUBD-<br>DecoyMaker2.0 | 2379             | 0.075     | 0.241                      |
| Training set 2        | 2263                       | Deepcoy                | 6125             | 0.071     | 0.224                      |
| Test set 2            | 755                        | MUBD-<br>DecoyMaker2.1 | 2379             | 0.075     | 0.241                      |

<sup>a</sup>Molecular\_Num, the number of inhibitors in training set/test set, <sup>b</sup>Num, the number of generated decoys based on training set/test set

Table S2 The optimal hyperparameters of RF models

|           | Max_leaf_nodes | n_estimators |
|-----------|----------------|--------------|
| Model A1  | 50             | 75           |
| Model A4  | 48             | 65           |
| Model A7  | 44             | 90           |
| Model B1  | 50             | 35           |
| Model B4  | 50             | 70           |
| Model B7  | 48             | 35           |
| Model C2  | 60             | 100          |
| Model C6  | 60             | 100          |
| Model C10 | 60             | 100          |
| Model D2  | 60             | 100          |
| Model D6  | 60             | 100          |
| Model D10 | 60             | 100          |
| Model E1  | 50             | 139          |
| Model E4  | 50             | 95           |
| Model E7  | 42             | 127          |
| Model F1  | 48             | 175          |
| Model F4  | 44             | 199          |
| Model F7  | 44             | 149          |

Table S3. The optimal hyperparameters of SVM models

|           | C   | gama     | epsilon |
|-----------|-----|----------|---------|
| Model A2  | 2   | 0.0625   |         |
| Model A5  | 4   | 0.015625 |         |
| Model A8  | 1   | 8        |         |
| Model B2  | 2   | 0.0625   |         |
| Model B5  | 2   | 0.03125  |         |
| Model B8  | 1   | 16       |         |
| Model C3  | 4   | 4        | 0.25    |
| Model C7  | 8   | 1        | 0.0625  |
| Model C11 | 4   | 2        | 0.125   |
| Model D3  | 8   | 2        | 0.25    |
| Model D7  | 4   | 2        | 0.125   |
| Model D11 | 4   | 1        | 0.125   |
| Model E2  | 2   | 0.25     |         |
| Model E5  | 16  | 0.0625   |         |
| Model E8  | 8   | 16       |         |
| Model F2  | 0.5 | 0.125    |         |
| Model F5  | 4   | 0.007813 |         |
| Model F8  | 2   | 16       |         |

Table S4. The optimal hyperparameters of DNN models

|           | Network                | learning rate | optimization algorithm | loss function |
|-----------|------------------------|---------------|------------------------|---------------|
| Model A3  | [76, 200, 100, 50, 2]  | 0.0001        | Adam                   | BCEloss       |
| Model A6  | [294, 500, 200, 50, 2] | 0.0001        | Adam                   | BCEloss       |
| Model A9  | [24, 50, 20, 5, 2]     | 0.0001        | Adam                   | BCEloss       |
| Model B3  | [76, 200, 100, 50, 3]  | 0.0001        | Adam                   | BCEloss       |
| Model B6  | [293, 500, 200, 50, 3] | 0.0001        | Adam                   | BCEloss       |
| Model B9  | [24, 50, 20, 5, 3]     | 0.0001        | Adam                   | BCEloss       |
| Model C4  | [24, 100, 50, 20, 1]   | 0.0001        | Adam                   | MSEloss       |
| Model C8  | [33, 100, 50, 20, 1]   | 0.0001        | Adam                   | MSEloss       |
| Model C12 | [31, 100, 50, 20, 1]   | 0.0001        | Adam                   | MSEloss       |
| Model D4  | [27, 100, 50, 20, 1]   | 0.0001        | Adam                   | MSEloss       |
| Model D8  | [43, 100, 50, 20, 1]   | 0.0001        | Adam                   | MSEloss       |
| Model D12 | [45, 100, 50, 20, 1]   | 0.0001        | Adam                   | MSEloss       |
| Model E3  | [81, 200, 100, 50, 2]  | 0.0001        | Adam                   | BCEloss       |
| Model E6  | [299, 500, 200, 50, 2] | 0.0001        | Adam                   | BCEloss       |
| Model E9  | [13, 100, 50, 20, 2]   | 0.0001        | Adam                   | BCEloss       |
| Model F3  | [81, 200, 100, 50, 2]  | 0.0001        | Adam                   | BCEloss       |
| Model F6  | [298, 500, 200, 50, 2] | 0.0001        | Adam                   | BCEloss       |
| Model F9  | [16, 100, 50, 20, 2]   | 0.0001        | Adam                   | BCEloss       |

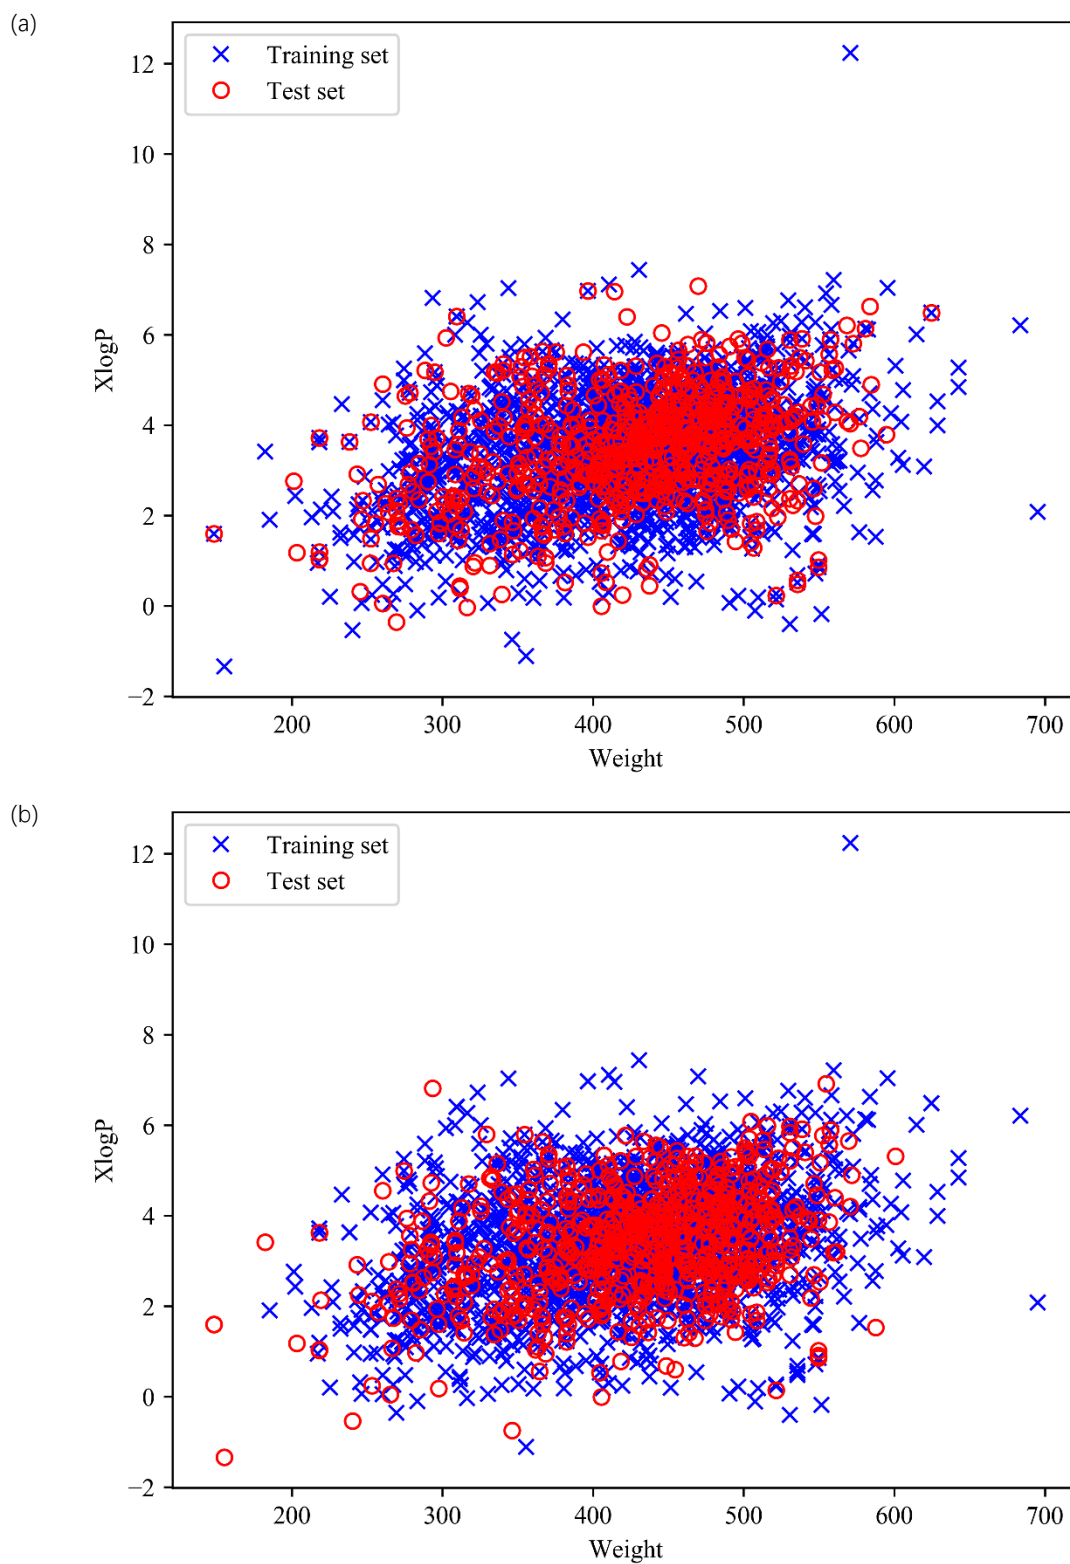

Figure S1. The chemical space visualized by the distribution of XlogP and molecular weight of training and test set. (a) is that of training set 1 and test set 1; (b) is that of training set 2 and test set 2.

## References

- S1. C. J. C. Connolly, J. M. Hamby, M. C. Schroeder, M. Barvian, G. H. Lu, R. L. Panek, A. Amar, C. Shen, A. J. Kraker, D. W. Fry, W. D. Klohs and A. M. Doherty, *Bioorganic and Medicinal Chemistry Letters*, 1997, **7**, 2415-2420.
- S2. N. S. Gray, L. Wodicka, A. M. Thunnissen, T. C. Norman, S. Kwon, F. H. Espinoza, D. O. Morgan, G. Barnes, S. LeClerc, L. Meijer, S. H. Kim, D. J. Lockhart and P. G. Schultz, *Science (New York, N.Y.)*, 1998, **281**, 533-538.
- S3. K. Inaba, H. Sato, M. Tsuda and J. Kobayashi, *Journal of Natural Products*, 1998, **61**, 693-695.
- S4. M. Barvian, D. H. Boschelli, J. Cossrow, E. Dobrusin, A. Fattaey, A. Fritsch, D. Fry, P. Harvey, P. Keller, M. Garrett, F. La, W. Leopold, D. McNamara, M. Quin, S. Trumpp-Kallmeyer, P. Toogood, Z. Wu and E. Zhang, *Journal of Medicinal Chemistry*, 2000, **43**, 4606-4616.
- S5. G. Brauers, R. A. Edrada, R. Ebel, P. Proksch, V. Wray, A. Berg, U. Grafe, C. Schachtele, F. Totzke, G. Finkenzeller, D. Marme, J. Kraus, M. Munchbach, M. Michel, G. Bringmann and K. Schaumann, *Journal of Natural Products*, 2000, **63**, 739-745.
- S6. WO2000012485A1, 2000.
- S7. J. K. Buolamwini, *Current Pharmaceutical Design*, 2000, **6**, 379-392.
- S8. P. M. Fischer and D. P. Lane, *Current Medicinal Chemistry*, 2000, **7**, 1213-1245.
- S9. H.-W. Jeong, M.-R. Kim, K.-H. Son, M. Young Han, J.-H. Ha, M. Garnier, L. Meijer and B.-M. Kwon, *Bioorganic and Medicinal Chemistry Letters*, 2000, **10**, 1819-1822.
- S10. K. S. Kim, J. S. Sack, J. S. Tokarski, L. Qian, S. T. Chao, L. Leith, Y. F. Kelly, R. N. Misra, J. T. Hunt, S. D. Kimball, W. G. Humphreys, B. S. Wautlet, J. G. Mulheron and K. R. Webster, *Journal of Medicinal Chemistry*, 2000, **43**, 4126-4134.
- S11. K. K. Murthi, M. Dubay, C. McClure, L. Brizuela, M. D. Boisclair, P. J. Worland, M. M. Mansuri and K. Pal, *Bioorganic and Medicinal Chemistry Letters*, 2000, **10**, 1037-1041.
- S12. C.-K. Ryu, H.-Y. Kang, S. K. Lee, K. A. Nam, C. Y. Hong, W.-G. Ko and B.-H. Lee, *Bioorganic and Medicinal Chemistry Letters*, 2000, **10**, 461-464.
- S13. D. J. Carini, R. F. Kaltenbach, J. Liu, P. A. Benfield, J. Boylan, M. Boisclair, L. Brizuela, C. R. Burton, S. Cox, R. Grafstrom, B. A. Harrison, K. Harrison, E. Akamike, J. A. Markwalder, Y. Nakano, S. P. Seitz, D. M. Sharp, G. L. Trainor and T. M. Sielecki, *Bioorganic and Medicinal Chemistry Letters*, 2001, **11**, 2209-2211.
- S14. M. K. Dreyer, D. R. Borcharding, J. A. Dumont, N. P. Peet, J. T. Tsay, P. S. Wright, A. J. Bitonti, J. Shen and S. H. Kim, *Journal of Medicinal Chemistry*, 2001, **44**, 524-530.
- S15. T. Honma, K. Hayashi, T. Aoyama, N. Hashimoto, T. Machida, K. Fukasawa, T. Iwama, C. Ikeura, M. Ikuta, I. Suzuki-Takahashi, Y. Iwasawa, T. Hayama, S. Nishimura and H. Morishima, *Journal of Medicinal Chemistry*, 2001, **44**, 4615-4627.
- S16. T. Honma, T. Yoshizumi, N. Hashimoto, K. Hayashi, N. Kawanishi, K. Fukasawa, T. Takaki, C. Ikeura, M. Ikuta, I. Suzuki-Takahashi, T. Hayama, S. Nishimura and H. Morishima, *Journal of Medicinal Chemistry*, 2001, **44**, 4628-4640.
- S17. D. A. Nugiel, A. M. Etzkorn, A. Vidwans, P. A. Benfield, M. Boisclair, C. R. Burton, S. Cox, P. M. Czerniak, D. Doleniak and S. P. Seitz, *Journal of Medicinal Chemistry*, 2001, **44**, 1334-1336.
- S18. C.-H. Oh, H.-K. Kim, S.-C. Lee, C. Oh, B.-S. Yang, H. J. Rhee and J.-H. Cho, *Archiv der Pharmazie*, 2001, **334**, 345-350.
- S19. M. C. Schroeder, J. M. Hamby, C. J. Connolly, P. J. Grohar, R. T. Winters, M. R. Barvian, C. W.

- Moore, S. L. Boushelle, S. M. Crean, A. J. Kraker, D. L. Driscoll, P. W. Vincent, W. L. Elliott, G. H. Lu, B. L. Batley, T. K. Dahring, T. C. Major, R. L. Panek, A. M. Doherty and H. D. Showalter, *Journal of Medicinal Chemistry*, 2001, **44**, 1915-1926.
- S20. P. W. Shum, N. P. Peet, P. M. Weintraub, T. B. Le, Z. Zhao, F. Barbone, B. Cashman, J. Tsay, S. Dwyer, P. C. Loos, E. A. Powers, K. Kropp, P. S. Wright, A. Bitonti, J. Dumont and D. R. Borcharding, *Nucleosides Nucleotides Nucleic Acids*, 2001, **20**, 1067-1078.
- S21. T. M. Sielecki, T. L. Johnson, J. Liu, J. K. Muckelbauer, R. H. Grafstrom, S. Cox, J. Boylan, C. R. Burton, H. Chen, A. Smallwood, C.-H. Chang, M. Boisclair, P. A. Benfield, G. L. Trainor and S. P. Seitz, *Bioorganic and Medicinal Chemistry Letters*, 2001, **11**, 1157-1160.
- S22. US6413974B1, 2002.
- S23. US6479487B1, 2002.
- S24. K. S. Kim, S. D. Kimball, R. N. Misra, D. B. Rawlins, J. T. Hunt, H. Y. Xiao, S. Lu, L. Qian, W. C. Han, W. Shan, T. Mitt, Z. W. Cai, M. A. Poss, H. Zhu, J. S. Sack, J. S. Tokarski, C. Y. Chang, N. Pavletich, A. Kamath, W. G. Humphreys, P. Marathe, I. Bursuker, K. A. Kellar, U. Roongta, R. Batorsky, J. G. Mulheron, D. Bol, C. R. Fairchild, F. Y. Lee and K. R. Webster, *Journal of Medicinal Chemistry*, 2002, **45**, 3905-3927.
- S25. T. Naumann and H. Matter, *Journal of Medicinal Chemistry*, 2002, **45**, 2366-2378.
- S26. D. A. Nugiel, A. Vidwans, A. M. Etzkorn, K. A. Rossi, P. A. Benfield, C. R. Burton, S. Cox, D. Doleniak and S. P. Seitz, *Journal of Medicinal Chemistry*, 2002, **45**, 5224-5232.
- S27. J. Schoepfer, H. Fretz, B. Chaudhuri, L. Muller, E. Seeber, L. Meijer, O. Lozach, E. Vangrevelinghe and P. Furet, *Journal of Medicinal Chemistry*, 2002, **45**, 1741-1747.
- S28. E. W. Yue, C. A. Higley, S. V. DiMeo, D. J. Carini, D. A. Nugiel, C. Benware, P. A. Benfield, C. R. Burton, S. Cox, R. H. Grafstrom, D. M. Sharp, L. M. Sisk, J. F. Boylan, J. K. Muckelbauer, A. M. Smallwood, H. Chen, C. H. Chang, S. P. Seitz and G. L. Trainor, *Journal of Medicinal Chemistry*, 2002, **45**, 5233-5248.
- S29. M. Anderson, J. F. Beattie, G. A. Breault, J. Breed, K. F. Byth, J. D. Culshaw, R. P. A. Ellston, S. Green, C. A. Minshull, R. A. Norman, R. A. Pauptit, J. Stanway, A. P. Thomas and P. J. Jewsbury, *Bioorganic and Medicinal Chemistry Letters*, 2003, **13**, 3021-3026.
- S30. WO2003062236A1, 2003.
- S31. J. F. Beattie, G. A. Breault, R. P. Ellston, S. Green, P. J. Jewsbury, C. J. Midgley, R. T. Naven, C. A. Minshull, R. A. Pauptit, J. A. Tucker and J. E. Pease, *Bioorganic and Medicinal Chemistry Letters*, 2003, **13**, 2955-2960.
- S32. WO2003097048A1, 2003.
- S33. T. A. Engler, K. Furness, S. Malhotra, C. Sanchez-Martinez, C. Shih, W. Xie, G. Zhu, X. Zhou, S. Conner, M. M. Faul, K. A. Sullivan, S. P. Kolis, H. B. Brooks, B. Patel, R. M. Schultz, T. B. DeHahn, K. Kirmani, C. D. Spencer, S. A. Watkins, E. L. Considine, J. A. Dempsey, C. A. Ogg, N. B. Stamm, B. D. Anderson, R. M. Campbell, V. Vasudevan and M. L. Lytle, *Bioorganic and Medicinal Chemistry Letters*, 2003, **13**, 2261-2267.
- S34. D. R. Goldberg, T. Butz, M. G. Cardozo, R. J. Eckner, A. Hammach, J. Huang, S. Jakes, S. Kapadia, M. Kashem, S. Lukas, T. M. Morwick, M. Panzenbeck, U. Patel, S. Pav, G. W. Peet, J. D. Peterson, A. S. Prokopowicz, 3rd, R. J. Snow, R. Sellati, H. Takahashi, J. Tan, M. A. Tschantz, X. J. Wang, Y. Wang, J. Wolak, P. Xiong and N. Moss, *Journal of Medicinal Chemistry*, 2003, **46**, 1337-1349.
- S35. Y. Mettey, M. Gompel, V. Thomas, M. Garnier, M. Leost, I. Ceballos-Picot, M. Noble, J.



- Endicott, J. M. Vierfond and L. Meijer, *Journal of Medicinal Chemistry*, 2003, **46**, 222-236.
- S36. R. N. Misra, D. B. Rawlins, H.-y. Xiao, W. Shan, I. Bursuker, K. A. Kellar, J. G. Mulheron, J. S. Sack, J. S. Tokarski, S. D. Kimball and K. R. Webster, *Bioorganic and Medicinal Chemistry Letters*, 2003, **13**, 1133-1136.
- S37. R. N. Misra, H.-y. Xiao, D. B. Rawlins, W. Shan, K. A. Kellar, J. G. Mulheron, J. S. Sack, J. S. Tokarski, S. D. Kimball and K. R. Webster, *Bioorganic and Medicinal Chemistry Letters*, 2003, **13**, 2405-2408.
- S38. C. Sanchez-Martinez, C. Shih, M. M. Faul, G. Zhu, M. Paal, C. Somoza, T. Li, C. A. Kumrich, L. L. Winneroski, Z. Xun, H. B. Brooks, B. K. R. Patel, R. M. Schultz, T. B. DeHahn, C. D. Spencer, S. A. Watkins, E. Considine, J. A. Dempsey, C. A. Ogg, R. M. Campbell, B. A. Anderson and J. Wagner, *Bioorganic and Medicinal Chemistry Letters*, 2003, **13**, 3835-3839.
- S39. C. Sanchez-Martinez, C. Shih, G. Zhu, T. Li, H. B. Brooks, B. K. R. Patel, R. M. Schultz, T. B. DeHahn, C. D. Spencer, S. A. Watkins, C. A. Ogg, E. Considine, J. A. Dempsey and F. Zhang, *Bioorganic and Medicinal Chemistry Letters*, 2003, **13**, 3841-3846.
- S40. A. Trejo, H. Arzeno, M. Browner, S. Chanda, S. Cheng, D. D. Comer, S. A. Dalrymple, P. Dunten, J. Lafargue, B. Lovejoy, J. Freire-Moar, J. Lim, J. McIntosh, J. Miller, E. Papp, D. Reuter, R. Roberts, F. Sanpablo, J. Saunders, K. Song, A. Villasenor, S. D. Warren, M. Welch, P. Weller, P. E. Whiteley, L. Zeng and D. M. Goldstein, *Journal of Medicinal Chemistry*, 2003, **46**, 4702-4713.
- S41. G. Zhu, S. Conner, X. Zhou, C. Shih, H. B. Brooks, E. Considine, J. A. Dempsey, C. Ogg, B. Patel, R. M. Schultz, C. D. Spencer, B. Teicher and S. A. Watkins, *Bioorganic and Medicinal Chemistry Letters*, 2003, **13**, 1231-1235.
- S42. G. Zhu, S. E. Conner, X. Zhou, C. Shih, T. Li, B. D. Anderson, H. B. Brooks, R. M. Campbell, E. Considine, J. A. Dempsey, M. M. Faul, C. Ogg, B. Patel, R. M. Schultz, C. D. Spencer, B. Teicher and S. A. Watkins, *Journal of Medicinal Chemistry*, 2003, **46**, 2027-2030.
- S43. R. S. Al-awar, J. E. Ray, K. A. Hecker, J. Huang, P. P. Waid, C. Shih, H. B. Brooks, C. D. Spencer, S. A. Watkins, B. R. Patel, N. B. Stamm, C. A. Ogg, R. M. Schultz, E. L. Considine, M. M. Faul, K. A. Sullivan, S. P. Kolis, J. L. Grutsch and S. Joseph, *Bioorganic and Medicinal Chemistry Letters*, 2004, **14**, 3217-3220.
- S44. R. S. Al-awar, J. E. Ray, K. A. Hecker, S. Joseph, J. Huang, C. Shih, H. B. Brooks, C. D. Spencer, S. A. Watkins, R. M. Schultz, E. L. Considine, M. M. Faul, K. A. Sullivan, S. P. Kolis, M. A. Carr and F. Zhang, *Bioorganic and Medicinal Chemistry Letters*, 2004, **14**, 3925-3928.
- S45. F. Becker, K. Murthi, C. Smith, J. Come, N. Costa-Roldan, C. Kaufmann, U. Hanke, C. Degenhart, S. Baumann, W. Wallner, A. Huber, S. Dedier, S. Dill, D. Kinsman, M. Hediger, N. Bockovich, S. Meier-Ewert, A. F. Kluge and N. Kley, *Chemistry and Biology*, 2004, **11**, 211-223.
- S46. K. F. Byth, J. D. Culshaw, S. Green, S. E. Oakes and A. P. Thomas, *Bioorganic and Medicinal Chemistry Letters*, 2004, **14**, 2245-2248.
- S47. P. Chen, D. Norris, J. Das, S. H. Spergel, J. Wityak, L. Leith, R. Zhao, B. C. Chen, S. Pitt, S. Pang, D. R. Shen, R. Zhang, H. F. De Fex, A. M. Doweyko, K. W. McIntyre, D. J. Shuster, K. Behnia, G. L. Schieven and J. C. Barrish, *Bioorganic and Medicinal Chemistry Letters*, 2004, **14**, 6061-6066.
- S48. C. D. Eamon and A. S. Nowak, *Structural Safety*, 2004, **26**, 29-47.
- S49. T. A. Engler, J. R. Henry, S. Malhotra, B. Cunningham, K. Furness, J. Brozinick, T. P.

- Burkholder, M. P. Clay, J. Clayton, C. Diefenbacher, E. Hawkins, P. W. Iversen, Y. Li, T. D. Lindstrom, A. L. Marquart, J. McLean, D. Mendel, E. Misener, D. Briere, J. C. O'Toole, W. J. Porter, S. Queener, J. K. Reel, R. A. Owens, R. A. Brier, T. E. Eessalu, J. R. Wagner, R. M. Campbell and R. Vaughn, *Journal of Medicinal Chemistry*, 2004, **47**, 3934-3937.
- S50. GB2392155A, 2004.
- S51. GB2392156A, 2004.
- S52. M. Gompel, M. Leost, E. B. De Kier Joffe, L. Puricelli, L. H. Franco, J. Palermo and L. Meijer, *Bioorganic and Medicinal Chemistry Letters*, 2004, **14**, 1703-1707.
- S53. C. Jaramillo, J. E. de Diego, C. Hamdouchi, E. Collins, H. Keyser, C. Sanchez-Martinez, M. del Prado, B. Norman, H. B. Brooks, S. A. Watkins, C. D. Spencer, J. A. Dempsey, B. D. Anderson, R. M. Campbell, T. Leggett, B. Patel, R. M. Schultz, J. Espinosa, M. Vieth, F. Zhang and D. E. Timm, *Bioorganic and Medicinal Chemistry Letters*, 2004, **14**, 6095-6099.
- S54. J. A. Markwalder, M. R. Arnone, P. A. Benfield, M. Boisclair, C. R. Burton, C. H. Chang, S. S. Cox, P. M. Czerniak, C. L. Dean, D. Doleniak, R. Grafstrom, B. A. Harrison, R. F. Kaltenbach, 3rd, D. A. Nugiel, K. A. Rossi, S. R. Sherk, L. M. Sisk, P. Stouten, G. L. Trainor, P. Worland and S. P. Seitz, *Journal of Medicinal Chemistry*, 2004, **47**, 5894-5911.
- S55. R. N. Misra, H. Y. Xiao, D. K. Williams, K. S. Kim, S. Lu, K. A. Keller, J. G. Mulheron, R. Batorsky, J. S. Tokarski, J. S. Sack, S. D. Kimball, F. Y. Lee and K. R. Webster, *Bioorganic and Medicinal Chemistry Letters*, 2004, **14**, 2973-2977.
- S56. D. A. Nugiel, A. Vidwans and C. D. Dzierba, *Bioorganic and Medicinal Chemistry Letters*, 2004, **14**, 5489-5491.
- S57. M. Oyama, Z. Xu, K.-H. Lee, T. Spitzer, P. Kitrinis, O. McDonald, R. Jones and E. Garvey, *Letters in Drug Design & Discovery*, 2004, **1**, 24-29.
- S58. P. Pevarello, M. G. Brasca, R. Amici, P. Orsini, G. Traquandi, L. Corti, C. Piutti, P. Sansonna, M. Villa, B. S. Pierce, M. Pulici, P. Giordano, K. Martina, E. L. Fritzen, R. A. Nugent, E. Casale, A. Cameron, M. Ciomei, F. Roletto, A. Isacchi, G. Fogliatto, E. Pesenti, W. Pastori, A. Marsiglio, K. L. Leach, P. M. Clare, F. Fiorentini, M. Varasi, A. Vulpetti and M. A. Warpehoski, *Journal of Medicinal Chemistry*, 2004, **47**, 3367-3380.
- S59. F. X. Tavares, J. A. Boucheron, S. H. Dickerson, R. J. Griffin, F. Preugschat, S. A. Thomson, T. Y. Wang and H. Q. Zhou, *Journal of Medicinal Chemistry*, 2004, **47**, 4716-4730.
- S60. WO2004056368A1, 2004.
- S61. E. W. Yue, S. V. DiMeo, C. A. Higley, J. A. Markwalder, C. R. Burton, P. A. Benfield, R. H. Grafstrom, S. Cox, J. K. Muckelbauer, A. M. Smallwood, H. Chen, C. H. Chang, G. L. Trainor and S. P. Seitz, *Bioorganic and Medicinal Chemistry Letters*, 2004, **14**, 343-346.
- S62. G. Zhu, S. E. Conner, X. Zhou, H. K. Chan, C. Shih, T. A. Engler, R. S. Al-Awar, H. B. Brooks, S. A. Watkins, C. D. Spencer, R. M. Schultz, J. A. Dempsey, E. L. Considine, B. R. Patel, C. A. Ogg, V. Vasudevan and M. L. Lytle, *Bioorganic and Medicinal Chemistry Letters*, 2004, **14**, 3057-3061.
- S63. Y. Bathini, I. Singh, P. J. Harvey, P. R. Keller, R. Singh, R. G. Micetich, D. W. Fry, E. M. Dobrusin and P. L. Toogood, *Bioorganic and Medicinal Chemistry Letters*, 2005, **15**, 3881-3885.
- S64. D. M. Berger, M. Dutia, G. Birnberg, D. Powell, D. H. Boschelli, Y. D. Wang, M. Ravi, D. Yaczko, J. Golas, J. Lucas and F. Boschelli, *Journal of Medicinal Chemistry*, 2005, **48**, 5909-5920.
- S65. D. H. Boschelli, B. Wu, A. C. Barrios Sosa, J. J. Chen, J. M. Golas and F. Boschelli, *Bioorganic*

- and Medicinal Chemistry Letters*, 2005, **15**, 4681-4684.
- S66. M. Caligiuri, F. Becker, K. Murthi, F. Kaplan, S. Dedier, C. Kaufmann, A. Machl, G. Zybarth, J. Richard, N. Bockovich, A. Kluge and N. Kley, *Chemistry and Biology*, 2005, **12**, 1103-1115.
- S67. J. G. Conway, B. McDonald, J. Parham, B. Keith, D. W. Rusnak, E. Shaw, M. Jansen, P. Lin, A. Payne, R. M. Crosby, J. H. Johnson, L. Frick, M. H. Lin, S. Depee, S. Tadepalli, B. Votta, I. James, K. Fuller, T. J. Chambers, F. C. Kull, S. D. Chamberlain and J. T. Hutchins, *Proceedings of the National Academy of Sciences of the United States*, 2005, **102**, 16078-16083.
- S68. C. Hamdouchi, B. Zhong, J. Mendoza, E. Collins, C. Jaramillo, J. E. De Diego, D. Robertson, C. D. Spencer, B. D. Anderson, S. A. Watkins, F. Zhang and H. B. Brooks, *Bioorganic and Medicinal Chemistry Letters*, 2005, **15**, 1943-1947.
- S69. C. Y. Ho, D. W. Ludovici, U. S. Maharroof, J. Mei, J. L. Sechler, R. W. Tuman, E. D. Strobel, L. Andraka, H. K. Yen, G. Leo, J. Li, H. Almond, H. Lu, A. DeVine, R. M. Tominovich, J. Baker, S. Emanuel, R. H. Gruninger, S. A. Middleton, D. L. Johnson and R. A. Galemme, Jr., *Journal of Medicinal Chemistry*, 2005, **48**, 8163-8173.
- S70. G. H. Kuo, A. Deangelis, S. Emanuel, A. Wang, Y. Zhang, P. J. Connolly, X. Chen, R. H. Gruninger, C. Rugg, A. Fuentes-Pesquera, S. A. Middleton, L. Jolliffe and W. V. Murray, *Journal of Medicinal Chemistry*, 2005, **48**, 4535-4546.
- S71. G. H. Kuo, C. Prouty, A. Wang, S. Emanuel, A. Deangelis, Y. Zhang, F. Song, L. Beall, P. J. Connolly, P. Karnachi, X. Chen, R. H. Gruninger, J. Sechler, A. Fuentes-Pesquera, S. A. Middleton, L. Jolliffe and W. V. Murray, *Journal of Medicinal Chemistry*, 2005, **48**, 4892-4909.
- S72. G. H. Kuo, A. Wang, S. Emanuel, A. Deangelis, R. Zhang, P. J. Connolly, W. V. Murray, R. H. Gruninger, J. Sechler, A. Fuentes-Pesquera, D. Johnson, S. A. Middleton, L. Jolliffe and X. Chen, *Journal of Medicinal Chemistry*, 2005, **48**, 1886-1900.
- S73. R. Lin, P. J. Connolly, S. Huang, S. K. Wetter, Y. Lu, W. V. Murray, S. L. Emanuel, R. H. Gruninger, A. R. Fuentes-Pesquera, C. A. Rugg, S. A. Middleton and L. K. Jolliffe, *Journal of Medicinal Chemistry*, 2005, **48**, 4208-4211.
- S74. H. Lu, D. J. Chang, B. Baratte, L. Meijer and U. Schulze-Gahmen, *Journal of Medicinal Chemistry*, 2005, **48**, 737-743.
- S75. P. Pevarello, M. G. Brasca, P. Orsini, G. Traquandi, A. Longo, M. Nesi, F. Orzi, C. Piutti, P. Sansonna, M. Varasi, A. Cameron, A. Vulpetti, F. Roletto, R. Alzani, M. Ciomei, C. Albanese, W. Pastori, A. Marsiglio, E. Pesenti, F. Fiorentini, J. R. Bischoff and C. Mercurio, *Journal of Medicinal Chemistry*, 2005, **48**, 2944-2956.
- S76. S. N. VanderWel, P. J. Harvey, D. J. McNamara, J. T. Repine, P. R. Keller, J. Quin, 3rd, R. J. Booth, W. L. Elliott, E. M. Dobrusin, D. W. Fry and P. L. Toogood, *Journal of Medicinal Chemistry*, 2005, **48**, 2371-2387.
- S77. S. Verma, D. Nagarathnam, J. Shao, L. Zhang, J. Zhao, Y. Wang, T. Li, E. Mull, I. Enyedy, C. Wang, Q. Zhu, M. Altieri, J. Jordan, T. T. Dang and S. Reddy, *Bioorganic and Medicinal Chemistry Letters*, 2005, **15**, 1973-1977.
- S78. B. Voigt, L. Meijer, O. Lozach, C. Schachtele, F. Totzke and A. Hilgeroth, *Bioorganic and Medicinal Chemistry Letters*, 2005, **15**, 823-825.
- S79. C. Aubry, A. J. Wilson, P. R. Jenkins, S. Mahale, B. Chaudhuri, J. D. Marechal and M. J. Sutcliffe, *Organic and Biomolecular Chemistry*, 2006, **4**, 787-801.
- S80. D. H. Boschelli, B. Wu, F. Ye, Y. Wang, J. M. Golas, J. Lucas and F. Boschelli, *Journal of Medicinal Chemistry*, 2006, **49**, 7868-7876.

- S81. A. Burgess, M. Wigan, N. Giles, W. Depinto, P. Gillespie, F. Stevens and B. Gabrielli, *Journal of Biological Chemistry*, 2006, **281**, 9987-9995.
- S82. N. Kawanishi, T. Sugimoto, J. Shibata, K. Nakamura, K. Masutani, M. Ikuta and H. Hirai, *Bioorganic and Medicinal Chemistry Letters*, 2006, **16**, 5122-5126.
- S83. V. Krystof, P. Cankar, I. Frysova, J. Slouka, G. Kontopidis, P. Dzubak, M. Hajduch, J. Srovnal, W. F. de Azevedo, Jr., M. Orsag, M. Paprskarova, J. Rolcik, A. Latr, P. M. Fischer and M. Strnad, *Journal of Medicinal Chemistry*, 2006, **49**, 6500-6509.
- S84. H. Lu and U. Schulze-Gahmen, *Journal of Medicinal Chemistry*, 2006, **49**, 3826-3831.
- S85. S. Mahale, C. Aubry, A. James Wilson, P. R. Jenkins, J. D. Marechal, M. J. Sutcliffe and B. Chaudhuri, *Bioorganic and Medicinal Chemistry Letters*, 2006, **16**, 4272-4278.
- S86. K. J. Moriarty, H. K. Koblish, T. Garrabrant, J. Maisuria, E. Khalil, F. Ali, I. P. Petrounia, C. S. Crysler, A. C. Maroney, D. L. Johnson and R. A. Galemno, Jr., *Bioorganic and Medicinal Chemistry Letters*, 2006, **16**, 5778-5783.
- S87. B. D. Palmer, A. M. Thompson, R. J. Booth, E. M. Dobrusin, A. J. Kraker, H. H. Lee, E. A. Lunney, L. H. Mitchell, D. F. Ortwine, J. B. Smaill, L. M. Swan and W. A. Denny, *Journal of Medicinal Chemistry*, 2006, **49**, 4896-4911.
- S88. C. Peifer, A. Krasowski, N. Hammerle, O. Kohlbacher, G. Dannhardt, F. Totzke, C. Schachtele and S. Laufer, *Journal of Medicinal Chemistry*, 2006, **49**, 7549-7553.
- S89. P. Pevarello, D. Fancelli, A. Vulpetti, R. Amici, M. Villa, V. Pittala, P. Vianello, A. Cameron, M. Ciomei, C. Mercurio, J. R. Bischoff, F. Roletto, M. Varasi and M. G. Brasca, *Bioorganic and Medicinal Chemistry Letters*, 2006, **16**, 1084-1090.
- S90. D. J. Pratt, J. Bentley, P. Jewsbury, F. T. Boyle, J. A. Endicott and M. E. Noble, *Journal of Medicinal Chemistry*, 2006, **49**, 5470-5477.
- S91. T. Shimamura, J. Shibata, H. Kurihara, T. Mita, S. Otsuki, T. Sagara, H. Hirai and Y. Iwasawa, *Bioorganic and Medicinal Chemistry Letters*, 2006, **16**, 3751-3754.
- S92. J. Sridhar, N. Akula and N. Pattabiraman, *Journal of the American Association of Pharmaceutical Scientists*, 2006, **8**, E204-221.
- S93. D. H. Boschelli, A. C. Barrios Sosa, J. M. Golas and F. Boschelli, *Bioorganic and Medicinal Chemistry Letters*, 2007, **17**, 1358-1361.
- S94. A. Gopalsamy, M. Shi, D. H. Boschelli, R. Williamson, A. Olland, Y. Hu, G. Krishnamurthy, X. Han, K. Arndt and B. Guo, *Journal of Medicinal Chemistry*, 2007, **50**, 5547-5549.
- S95. K. S. Joshi, M. J. Rathos, R. D. Joshi, M. Sivakumar, M. Mascarenhas, S. Kamble, B. Lal and S. Sharma, *Molecular Cancer Therapeutics*, 2007, **6**, 918-925.
- S96. S. Kohfeld, P. G. Jones, F. Totzke, C. Schachtele, M. H. Kubbutat and C. Kunick, *European journal of medicinal chemistry*, 2007, **42**, 1317-1324.
- S97. F. Marchetti, K. L. Sayle, J. Bentley, W. Clegg, N. J. Curtin, J. A. Endicott, B. T. Golding, R. J. Griffin, K. Haggerty, R. W. Harrington, V. Mesguiche, D. R. Newell, M. E. Noble, R. J. Parsons, D. J. Pratt, L. Z. Wang and I. R. Hardcastle, *Organic and Biomolecular Chemistry*, 2007, **5**, 1577-1585.
- S98. A. H. Aly, R. Edrada-Ebel, I. D. Indriani, V. Wray, W. E. Muller, F. Totzke, U. Zirrgiebel, C. Schachtele, M. H. Kubbutat, W. H. Lin, P. Proksch and R. Ebel, *Journal of Natural Products*, 2008, **71**, 972-980.
- S99. M. Anderson, D. M. Andrews, A. J. Barker, C. A. Brassington, J. Breed, K. F. Byth, J. D. Culshaw, M. R. V. Finlay, E. Fisher, H. H. J. McMiken, C. P. Green, D. W. Heaton, I. A. Nash,

- N. J. Newcombe, S. E. Oakes, R. A. Pauptit, A. Roberts, J. J. Stanway, A. P. Thomas, J. A. Tucker, M. Walker and H. M. Weir, *Bioorganic and Medicinal Chemistry Letters*, 2008, **18**, 5487-5492.
- S100. D. C. Cole, M. Asselin, A. Brennan, R. Czerwinski, J. W. Ellingboe, L. Fitz, R. Greco, X. Huang, D. Joseph-McCarthy, M. F. Kelly, M. Kirisits, J. Lee, Y. Li, P. Morgan, J. R. Stock, D. H. Tsao, A. Wissner, X. Yang and D. Chaudhary, *Journal of Medicinal Chemistry*, 2008, **51**, 5958-5963.
- S101. V. N. Danilenko, A. Y. Simonov, S. A. Lakatosh, M. H. Kubbutat, F. Totzke, C. Schachtele, S. M. Elizarov, O. B. Bekker, S. S. Printsevskaya, Y. N. Luzikov, M. I. Reznikova, A. A. Shtil and M. N. Preobrazhenskaya, *Journal of Medicinal Chemistry*, 2008, **51**, 7731-7736.
- S102. F. Hilberg, G. J. Roth, M. Krssak, S. Kautschitsch, W. Sommergruber, U. Tontsch-Grunt, P. Garin-Chesa, G. Bader, A. Zoephel, J. Quant, A. Heckel and W. J. Rettig, *Cancer Research*, 2008, **68**, 4774-4782.
- S103. P. R. Jenkins, J. Wilson, D. Emmerson, M. D. Garcia, M. R. Smith, S. J. Gray, R. G. Britton, S. Mahale and B. Chaudhuri, *Bioorganic and Medicinal Chemistry*, 2008, **16**, 7728-7739.
- S104. C. D. Jones, D. M. Andrews, A. J. Barker, K. Blades, K. F. Byth, M. R. Finlay, C. Geh, C. P. Green, M. Johannsen, M. Walker and H. M. Weir, *Bioorganic and Medicinal Chemistry Letters*, 2008, **18**, 6486-6489.
- S105. J. Lee, H. Choi, K. H. Kim, S. Jeong, J. W. Park, C. S. Baek and S. H. Lee, *Bioorganic and Medicinal Chemistry Letters*, 2008, **18**, 2292-2295.
- S106. C. Peifer, R. Selig, K. Kinkel, D. Ott, F. Totzke, C. Schachtele, R. Heidenreich, M. Rocken, D. Schollmeyer and S. Laufer, *Journal of Medicinal Chemistry*, 2008, **51**, 3814-3824.
- S107. W. G. Roberts, E. Ung, P. Whalen, B. Cooper, C. Hulford, C. Autry, D. Richter, E. Emerson, J. Lin, J. Kath, K. Coleman, L. Yao, L. Martinez-Alsina, M. Lorenzen, M. Berliner, M. Luzzio, N. Patel, E. Schmitt, S. LaGreca, J. Jani, M. Wessel, E. Marr, M. Griffor and F. Vajdos, *Cancer Research*, 2008, **68**, 1935-1944.
- S108. K. L. Stevens, M. J. Reno, J. B. Alberti, D. J. Price, L. S. Kane-Carson, V. B. Knick, L. M. Shewchuk, A. M. Hassell, J. M. Veal, S. T. Davis, R. J. Griffin and M. R. Peel, *Bioorganic and Medicinal Chemistry Letters*, 2008, **18**, 5758-5762.
- S109. H. R. Tsou, M. Otteng, T. Tran, M. B. Floyd, Jr., M. Reich, G. Birnberg, K. Kutterer, S. Ayrakaloustian, M. Ravi, R. Nilakantan, M. Grillo, J. P. McGinnis and S. K. Rabindran, *Journal of Medicinal Chemistry*, 2008, **51**, 3507-3525.
- S110. A. Zask, J. Kaplan, L. Toral-Barza, I. Hollander, M. Young, M. Tischler, C. Gaydos, M. Cinque, J. Lucas and K. Yu, *Journal of Medicinal Chemistry*, 2008, **51**, 1319-1323.
- S111. C. Aubry, A. J. Wilson, D. Emmerson, E. Murphy, Y. Y. Chan, M. P. Dickens, M. D. Garcia, P. R. Jenkins, S. Mahale and B. Chaudhuri, *Bioorganic and Medicinal Chemistry*, 2009, **17**, 6073-6084.
- S112. D. M. Berger, N. Torres, M. Dutia, D. Powell, G. Ciszewski, A. Gopalsamy, J. I. Levin, K. H. Kim, W. Xu, J. Wilhelm, Y. Hu, K. Collins, L. Feldberg, S. Kim, E. Frommer, D. Wojciechowicz and R. Mallon, *Bioorganic and Medicinal Chemistry Letters*, 2009, **19**, 6519-6523.
- S113. M. G. Brasca, N. Amboldi, D. Ballinari, A. Cameron, E. Casale, G. Cervi, M. Colombo, F. Colotta, V. Croci, R. D'Alessio, F. Fiorentini, A. Isacchi, C. Mercurio, W. Moretti, A. Panzeri, W. Pastori, P. Pevarello, F. Quartieri, F. Roletto, G. Traquandi, P. Vianello, A. Vulpetti and M. Ciomei, *Journal of Medicinal Chemistry*, 2009, **52**, 5152-5163.
- S114. WO2009085185A1, 2009.

- S115. A. Debbab, A. H. Aly, R. Edrada-Ebel, V. Wray, W. E. Muller, F. Totzke, U. Zirrgiebel, C. Schachtele, M. H. Kubbutat, W. H. Lin, M. Mosaddak, A. Hakiki, P. Proksch and R. Ebel, *Journal of Natural Products*, 2009, **72**, 626-631.
- S116. I. N. Gaisina, F. Gallier, A. V. Ougolkov, K. H. Kim, T. Kurome, S. Guo, D. Holzle, D. N. Luchini, S. Y. Blond, D. D. Billadeau and A. P. Kozikowski, *Journal of Medicinal Chemistry*, 2009, **52**, 1853-1863.
- S117. A. Gopalsamy, G. Ciszewski, Y. Hu, F. Lee, L. Feldberg, E. Frommer, S. Kim, K. Collins, D. Wojciechowicz and R. Mallon, *Bioorganic and Medicinal Chemistry Letters*, 2009, **19**, 2735-2738.
- S118. T. Horiuchi, J. Chiba, K. Uoto and T. Soga, *Bioorganic and Medicinal Chemistry Letters*, 2009, **19**, 305-308.
- S119. T. Horiuchi, M. Nagata, M. Kitagawa, K. Akahane and K. Uoto, *Bioorganic and Medicinal Chemistry*, 2009, **17**, 7850-7860.
- S120. M. Menichincheri, A. Bargiotti, J. Berthelsen, J. A. Bertrand, R. Bossi, A. Ciavolella, A. Cirila, C. Cristiani, V. Croci, R. D'Alessio, M. Fasolini, F. Fiorentini, B. Forte, A. Isacchi, K. Martina, A. Molinari, A. Montagnoli, P. Orsini, F. Orzi, E. Pesenti, D. Pezzetta, A. Pillan, I. Poggesi, F. Roletto, A. Scolaro, M. Tato, M. Tibolla, B. Valsasina, M. Varasi, D. Volpi, C. Santocanale and E. Vanotti, *Journal of Medicinal Chemistry*, 2009, **52**, 293-307.
- S121. N. Phosrithong and J. Ungwitayatorn, *Medicinal Chemistry Research*, 2009, **19**, 817-835.
- S122. G. J. Roth, A. Heckel, F. Colbatzky, S. Handschuh, J. Kley, T. Lehmann-Lintz, R. Lotz, U. Tontsch-Grunt, R. Walter and F. Hilberg, *Journal of Medicinal Chemistry*, 2009, **52**, 4466-4480.
- S123. S. Tasler, O. Muller, T. Wieber, T. Herz, R. Krauss, F. Totzke, M. H. Kubbutat and C. Schachtele, *Bioorganic and Medicinal Chemistry Letters*, 2009, **19**, 1349-1356.
- S124. H. R. Tsou, X. Liu, G. Birnberg, J. Kaplan, M. Otteng, T. Tran, K. Kutterer, Z. Tang, R. Suayan, A. Zask, M. Ravi, A. Bretz, M. Grillo, J. P. McGinnis, S. K. Rabindran, S. Ayral-Kaloustian and T. S. Mansour, *Journal of Medicinal Chemistry*, 2009, **52**, 2289-2310.
- S125. I. Beria, D. Ballinari, J. A. Bertrand, D. Borghi, R. T. Bossi, M. G. Brasca, P. Cappella, M. Caruso, W. Ceccarelli, A. Ciavolella, C. Cristiani, V. Croci, A. De Ponti, G. Fachin, R. D. Ferguson, J. Lansen, J. K. Moll, E. Pesenti, H. Posteri, R. Perego, M. Rocchetti, P. Storici, D. Volpi and B. Valsasina, *Journal of Medicinal Chemistry*, 2010, **53**, 3532-3551.
- S126. WO2010020675A1, 2010.
- S127. M. G. Brasca, C. Albanese, R. Alzani, R. Amici, N. Avanzi, D. Ballinari, J. Bischoff, D. Borghi, E. Casale, V. Croci, F. Fiorentini, A. Isacchi, C. Mercurio, M. Nesi, P. Orsini, W. Pastori, E. Pesenti, P. Pevarello, P. Roussel, M. Varasi, D. Volpi, A. Vulpetti and M. Ciomei, *Bioorganic and Medicinal Chemistry*, 2010, **18**, 1844-1853.
- S128. D. Caridha, A. K. Kathcart, D. Jirage and N. C. Waters, *Bioorganic and Medicinal Chemistry Letters*, 2010, **20**, 3863-3867.
- S129. Y. S. Cho, M. Borland, C. Brain, C. H. Chen, H. Cheng, R. Chopra, K. Chung, J. Groarke, G. He, Y. Hou, S. Kim, S. Kovats, Y. Lu, M. O'Reilly, J. Shen, T. Smith, G. Trakshel, M. Vogtle, M. Xu, M. Xu and M. J. Sung, *Journal of Medicinal Chemistry*, 2010, **53**, 7938-7957.
- S130. B. Y. Choi and C. H. Lee, *Bioorganic and Medicinal Chemistry Letters*, 2010, **20**, 3880-3884.
- S131. A. Gopalsamy, M. Shi, Y. Hu, F. Lee, L. Feldberg, E. Frommer, S. Kim, K. Collins, D. Wojciechowicz and R. Mallon, *Bioorganic and Medicinal Chemistry Letters*, 2010, **20**, 2431-2434.

- S132. D. A. Heathcote, H. Patel, S. H. Kroll, P. Hazel, M. Periyasamy, M. Alikian, S. K. Kanneganti, A. S. Jogalekar, B. Scheiper, M. Barbazanges, A. Blum, J. Brackow, A. Siwicka, R. D. Pace, M. J. Fuchter, J. P. Snyder, D. C. Liotta, P. S. Freemont, E. O. Aboagye, R. C. Coombes, A. G. Barrett and S. Ali, *Journal of Medicinal Chemistry*, 2010, **53**, 8508-8522.
- S133. V. R. Hegde, S. Borges, M. Patel, P. R. Das, B. Wu, V. P. Gullo and T. M. Chan, *Bioorganic and Medicinal Chemistry Letters*, 2010, **20**, 1344-1346.
- S134. V. R. Hegde, S. Borges, H. Pu, M. Patel, V. P. Gullo, B. Wu, P. Kirschmeier, M. J. Williams, V. Madison, T. Fischmann and T. M. Chan, *Bioorganic and Medicinal Chemistry Letters*, 2010, **20**, 1384-1387.
- S135. M. Herdemann, I. Heit, F. U. Bosch, G. Quintini, C. Scheipers and A. Weber, *Bioorganic and Medicinal Chemistry Letters*, 2010, **20**, 6998-7003.
- S136. L. Koehler, F. Graf, R. Bergmann, J. Steinbach, J. Pietzsch and F. Wuest, *European journal of medicinal chemistry*, 2010, **45**, 727-737.
- S137. M. Krug, G. Erlenkamp, W. Sippl, C. Schachtele, F. Totzke and A. Hilgeroth, *Bioorganic and Medicinal Chemistry Letters*, 2010, **20**, 6915-6919.
- S138. EP2179992A1, 2010.
- S139. M. Menichincheri, C. Albanese, C. Alli, D. Ballinari, A. Bargiotti, M. Caldarelli, A. Ciavoletta, A. Cirila, M. Colombo, F. Colotta, V. Croci, R. D'Alessio, M. D'Anello, A. Ermoli, F. Fiorentini, B. Forte, A. Galvani, P. Giordano, A. Isacchi, K. Martina, A. Molinari, J. K. Moll, A. Montagnoli, P. Orsini, F. Orzi, E. Pesenti, A. Pillan, F. Roletto, A. Scolaro, M. Tato, M. Tibolla, B. Valsasina, M. Varasi, P. Vianello, D. Volpi, C. Santocanale and E. Vanotti, *Journal of Medicinal Chemistry*, 2010, **53**, 7296-7315.
- S140. G. Traquandi, M. Ciomei, D. Ballinari, E. Casale, N. Colombo, V. Croci, F. Fiorentini, A. Isacchi, A. Longo, C. Mercurio, A. Panzeri, W. Pastori, P. Pevarello, D. Volpi, P. Roussel, A. Vulpetti and M. G. Brasca, *Journal of Medicinal Chemistry*, 2010, **53**, 2171-2187.
- S141. I. S. Vizirianakis, M. Chatzopoulou, I. D. Bonovolias, I. Nicolaou, V. J. Demopoulos and A. S. Tsiftoglou, *Journal of Medicinal Chemistry*, 2010, **53**, 6779-6810.
- S142. H. Zou, L. Zhou, Y. Li, Y. Cui, H. Zhong, Z. Pan, Z. Yang and J. Quan, *Journal of Medicinal Chemistry*, 2010, **53**, 994-1003.
- S143. I. Beria, R. T. Bossi, M. G. Brasca, M. Caruso, W. Ceccarelli, G. Fachin, M. Fasolini, B. Forte, F. Fiorentini, E. Pesenti, D. Pezzetta, H. Posterl, A. Scolaro, S. Re Depaolini and B. Valsasina, *Bioorganic and Medicinal Chemistry Letters*, 2011, **21**, 2969-2974.
- S144. WO2011101409A1, 2011.
- S145. V. Guagnano, P. Furet, C. Spanka, V. Bordas, M. Le Douget, C. Stamm, J. Brueggen, M. R. Jensen, C. Schnell, H. Schmid, M. Wartmann, J. Berghausen, P. Drueckes, A. Zimmerlin, D. Bussiere, J. Murray and D. Graus Porta, *Journal of Medicinal Chemistry*, 2011, **54**, 7066-7083.
- S146. WO2011110612A1, 2011.
- S147. E. Marsault and M. L. Peterson, *Journal of Medicinal Chemistry*, 2011, **54**, 1961-2004.
- S148. G. Nemeth, Z. Varga, Z. Greff, G. Bencze, A. Sipos, C. Szantai-Kis, F. Baska, A. Gyuris, K. Kelemenics, Z. Szathmary, J. Minarovits, G. Keri and L. Orfi, *Current Pharmaceutical Design*, 2011, **18**, 342-358.
- S149. S. C. Wilson, B. Atrash, C. Barlow, S. Eccles, P. M. Fischer, A. Hayes, L. Kelland, W. Jackson, M. Jarman, A. Mirza, J. Moreno, B. P. Nutley, F. I. Raynaud, P. Sheldrake, M. Walton, R. Westwood, S. Whittaker, P. Workman and E. McDonald, *Bioorganic and Medicinal Chemistry*,

- 2011, **19**, 6949-6965.
- S150. US20110042570A1, 2011.
- S151. M. Caruso, B. Valsasina, D. Ballinari, J. Bertrand, M. G. Brasca, M. Caldarelli, P. Cappella, F. Fiorentini, L. M. Gianellini, A. Scolaro and I. Beria, *Bioorganic and Medicinal Chemistry Letters*, 2012, **22**, 96-101.
- S152. WO2012129344A1, 2012.
- S153. Y. S. Cho, H. Angove, C. Brain, C. H. Chen, H. Cheng, R. Cheng, R. Chopra, K. Chung, M. Congreve, C. Dagostin, D. J. Davis, R. Feltell, J. Giraldes, S. D. Hiscock, S. Kim, S. Kovats, B. Lagu, K. Lewry, A. Loo, Y. Lu, M. Luzzio, W. Maniara, R. McMenamin, P. N. Mortenson, R. Benning, M. O'Reilly, D. C. Rees, J. Shen, T. Smith, Y. Wang, G. Williams, A. J. Woolford, W. Wrona, M. Xu, F. Yang and S. Howard, *ACS Medicinal Chemistry Letters*, 2012, **3**, 445-449.
- S154. K. Huber, L. Brault, O. Fedorov, C. Gasser, P. Filippakopoulos, A. N. Bullock, D. Fabbro, J. Trappe, J. Schwaller, S. Knapp and F. Bracher, *Journal of Medicinal Chemistry*, 2012, **55**, 403-413.
- S155. C. Hundsdorfer, H. J. Hemmerling, C. Gotz, F. Totzke, P. Bednarski, M. Le Borgne and J. Jose, *Bioorganic and Medicinal Chemistry*, 2012, **20**, 2282-2289.
- S156. D. P. Rotella, *Bioorganic and Medicinal Chemistry Letters*, 2012, **22**, 6788-6793.
- S157. M. Sunose, K. Bell, K. Ellard, G. Bergamini, G. Neubauer, T. Werner and N. Ramsden, *Bioorganic and Medicinal Chemistry Letters*, 2012, **22**, 4613-4618.
- S158. WO2012061156A1, 2012.
- S159. J. J. Liu, B. Higgins, G. Ju, K. Kolinsky, K. C. Luk, K. Packman, G. Pizzolato, Y. Ren, K. Thakkar, C. Tovar, Z. Zhang and P. M. Wovkulich, *ACS Medicinal Chemistry Letters*, 2013, **4**, 259-263.
- S160. S. Liu, P. N. Premnath, J. K. Bolger, T. L. Perkins, L. O. Kirkland, G. Kontopidis and C. McInnes, *Journal of Medicinal Chemistry*, 2013, **56**, 1573-1582.
- S161. T. H. Marsilje, W. Pei, B. Chen, W. Lu, T. Uno, Y. Jin, T. Jiang, S. Kim, N. Li, M. Warmuth, Y. Sarkisova, F. Sun, A. Steffy, A. C. Pferdekamper, A. G. Li, S. B. Joseph, Y. Kim, B. Liu, T. Tuntland, X. Cui, N. S. Gray, R. Steensma, Y. Wan, J. Jiang, G. Chopiuk, J. Li, W. P. Gordon, W. Richmond, K. Johnson, J. Chang, T. Groessler, Y. Q. He, A. Phimister, A. Aycinena, C. C. Lee, B. Bursulaya, D. S. Karanewsky, H. M. Seidel, J. L. Harris and P. Y. Michellys, *Journal of Medicinal Chemistry*, 2013, **56**, 5675-5690.
- S162. H. Niemann, W. Lin, W. E. Muller, M. Kubbutat, D. Lai and P. Proksch, *Journal of Natural Products*, 2013, **76**, 121-125.
- S163. W. S. Palmer, M. Alam, H. B. Arzeno, K. C. Chang, J. P. Dunn, D. M. Goldstein, L. Gong, B. Goyal, J. C. Hermann, J. H. Hogg, G. Hsieh, A. Jahangir, C. Janson, S. Jin, R. Ursula Kammlott, A. Kuglstatter, C. Lukacs, C. Michoud, L. Niu, D. C. Reuter, A. Shao, T. Silva, T. A. Trejo-Martin, K. Stein, Y. C. Tan, P. Tivitmahaisoon, P. Tran, P. Wagner, P. Weller and S. Y. Wu, *Bioorganic and Medicinal Chemistry Letters*, 2013, **23**, 1486-1492.
- S164. N. A. Powell, J. K. Hoffman, F. L. Ciske, J. T. Kohrt, S. M. Baxi, Y. W. Peng, M. Zhong, C. Catana, J. Ohren, L. A. Perrin and J. J. Edmunds, *Bioorganic and Medicinal Chemistry Letters*, 2013, **23**, 1051-1055.
- S165. E. Schonbrunn, S. Betzi, R. Alam, M. P. Martin, A. Becker, H. Han, R. Francis, R. Chakrasali, S. Jakkaraaj, A. Kazi, S. M. Sebti, C. L. Cubitt, A. W. Gebhard, L. A. Hazlehurst, J. S. Tash and G. I. Georg, *Journal of Medicinal Chemistry*, 2013, **56**, 3768-3782.



- S166. H. Shao, S. Shi, S. Huang, A. J. Hole, A. Y. Abbas, S. Baumli, X. Liu, F. Lam, D. W. Foley, P. M. Fischer, M. Noble, J. A. Endicott, C. Pepper and S. Wang, *Journal of Medicinal Chemistry*, 2013, **56**, 640-659.
- S167. J. Sun, X. H. Lv, H. Y. Qiu, Y. T. Wang, Q. R. Du, D. D. Li, Y. H. Yang and H. L. Zhu, *European journal of medicinal chemistry*, 2013, **68**, 1-9.
- S168. Y. Deng, G. W. Shipps, Jr., A. Cooper, J. M. English, D. A. Annis, D. Carr, Y. Nan, T. Wang, H. Y. Zhu, C. C. Chuang, P. Dayananth, A. W. Hruza, L. Xiao, W. Jin, P. Kirschmeier, W. T. Windsor and A. A. Samatar, *Journal of Medicinal Chemistry*, 2014, **57**, 8817-8826.
- S169. Z. Li, X. Wang, J. Eksterowicz, M. W. Gribble, Jr., G. Q. Alba, M. Ayres, T. J. Carlson, A. Chen, X. Chen, R. Cho, R. V. Connors, M. DeGraffenreid, J. T. Deignan, J. Duquette, P. Fan, B. Fisher, J. Fu, J. N. Huard, J. Kaizerman, K. S. Keegan, C. Li, K. Li, Y. Li, L. Liang, W. Liu, S. E. Lively, M. C. Lo, J. Ma, D. L. McMinn, J. T. Mihalic, K. Modi, R. Ngo, K. Pattabiraman, D. E. Piper, C. Queva, M. L. Ragains, J. Suchomel, S. Thibault, N. Walker, X. Wang, Z. Wang, M. Wanska, P. M. Wehn, M. F. Weidner, A. J. Zhang, X. Zhao, A. Kamb, D. Wickramasinghe, K. Dai, L. R. McGee and J. C. Medina, *Journal of Medicinal Chemistry*, 2014, **57**, 3430-3449.
- S170. S. Mahale, S. B. Bharate, S. Manda, P. Joshi, S. S. Bharate, P. R. Jenkins, R. A. Vishwakarma and B. Chaudhuri, *Journal of Medicinal Chemistry*, 2014, **57**, 9658-9672.
- S171. P. N. Premnath, S. Liu, T. Perkins, J. Abbott, E. Anderson and C. McInnes, *Bioorganic and Medicinal Chemistry*, 2014, **22**, 616-622.
- S172. US8889696B2, 2014.
- S173. M. V. Reddy, B. Akula, S. C. Cosenza, S. Athuluridivakar, M. R. Mallireddigari, V. R. Pallela, V. K. Billa, D. R. Subbaiah, E. V. Bharathi, R. Vasquez-Del Carpio, A. Padgaonkar, S. J. Baker and E. P. Reddy, *Journal of Medicinal Chemistry*, 2014, **57**, 578-599.
- S174. A. Reichelt, J. M. Bailis, M. D. Bartberger, G. Yao, H. Shu, M. R. Kaller, J. G. Allen, M. F. Weidner, K. S. Keegan and J. H. Dao, *European journal of medicinal chemistry*, 2014, **80**, 364-382.
- S175. WO2014144326A1, 2014.
- S176. M. T. Burger, G. Nishiguchi, W. Han, J. Lan, R. Simmons, G. Atallah, Y. Ding, V. Tamez, Y. Zhang, M. Mathur, K. Muller, C. Bellamacina, M. K. Lindvall, R. Zang, K. Huh, P. Feucht, T. Zavorotinskaya, Y. Dai, S. Basham, J. Chan, E. Ginn, A. Aycinena, J. Holash, J. Castillo, J. L. Langowski, Y. Wang, M. Y. Chen, A. Lambert, C. Fritsch, A. Kauffmann, E. Pfister, K. G. Vanasse and P. D. Garcia, *Journal of Medicinal Chemistry*, 2015, **58**, 8373-8386.
- S177. R. Horbert, B. Pinchuk, E. Johannes, J. Schlosser, D. Schmidt, D. Cappel, F. Totzke, C. Schachtele and C. Peifer, *Journal of Medicinal Chemistry*, 2015, **58**, 170-182.
- S178. C. Hutterer, J. Eickhoff, J. Milbradt, K. Korn, I. Zeittrager, H. Bahsi, S. Wagner, G. Zischinsky, A. Wolf, C. Degenhart, A. Unger, M. Baumann, B. Klebl and M. Marschall, *Antimicrob Agents Chemother*, 2015, **59**, 2062-2071.
- S179. R. Jorda, E. Schutznerova, P. Cankar, V. Brychtova, J. Navratilova and V. Krystof, *Bioorganic and Medicinal Chemistry*, 2015, **23**, 1975-1981.
- S180. P. N. Premnath, S. N. Craig, S. Liu, E. L. Anderson, A. I. Grigoroudis, G. Kontopidis, T. L. Perkins, M. D. Wyatt, D. L. Pittman and C. McInnes, *Journal of Medicinal Chemistry*, 2015, **58**, 433-442.
- S181. G. J. Roth, R. Binder, F. Colbatzky, C. Dallinger, R. Schlenker-Herceg, F. Hilberg, S. L. Wollin and R. Kaiser, *Journal of Medicinal Chemistry*, 2015, **58**, 1053-1063.

- S182. C. Sanchez-Martinez, L. M. Gelbert, M. J. Lallena and A. de Dios, *Bioorganic and Medicinal Chemistry Letters*, 2015, **25**, 3420-3435.
- S183. C. B. Baltus, R. Jorda, C. Marot, K. Berka, V. Bazgier, V. Krystof, G. Prie and M. C. Viaud-Massuard, *European journal of medicinal chemistry*, 2016, **108**, 701-719.
- S184. CN106146515A, 2016.
- S185. R. A. Fairhurst, T. H. Marsilje, S. Stutz, A. Boos, M. Niklaus, B. Chen, S. Jiang, W. Lu, P. Furet, C. McCarthy, F. Stauffer, V. Guagnano, A. Vaupel, P. Y. Michellys, C. Schnell and S. Jeay, *Bioorganic and Medicinal Chemistry Letters*, 2016, **26**, 2057-2064.
- S186. P. N. Premnath, S. N. Craig, S. Liu and C. McInnes, *Bioorganic and Medicinal Chemistry Letters*, 2016, **26**, 3754-3760.
- S187. M. V. Reddy, B. Akula, S. Jatiani, R. Vasquez-Del Carpio, V. K. Billa, M. R. Mallireddigari, S. C. Cosenza, D. R. Venkata Subbaiah, E. V. Bharathi, V. R. Pallela, P. Ramkumar, R. Jain, A. K. Aggarwal and E. P. Reddy, *Bioorganic and Medicinal Chemistry*, 2016, **24**, 521-544.
- S188. C. S. Rye, N. E. Chessum, S. Lamont, K. G. Pike, P. Faulder, J. Demeritt, P. Kemmitt, J. Tucker, L. Zani, M. D. Cheeseman, R. Isaac, L. Goodwin, J. Boros, F. Raynaud, A. Hayes, A. T. Henley, E. de Billy, C. J. Lynch, S. Y. Sharp, R. Te Poele, L. O. Fee, K. M. Foote, S. Green, P. Workman and K. Jones, *MedChemComm*, 2016, **7**, 1580-1586.
- S189. P. Schneider and G. Schneider, *Journal of Medicinal Chemistry*, 2016, **59**, 4077-4086.
- S190. Y. A. Sonawane, M. A. Taylor, J. V. Napoleon, S. Rana, J. I. Contreras and A. Natarajan, *Journal of Medicinal Chemistry*, 2016, **59**, 8667-8684.
- S191. L. Vymetalova, L. Havlicek, A. Sturc, Z. Skraskova, R. Jorda, T. Pospisil, M. Strnad and V. Krystof, *European journal of medicinal chemistry*, 2016, **110**, 291-301.
- S192. P. Wang, J. Huang, K. Wang and Y. Gu, *European journal of medicinal chemistry*, 2016, **122**, 546-556.
- S193. X. Cheng, K. H. Merz, S. Vatter, J. Zeller, S. Muehlbeyer, A. Thommet, J. Christ, S. Wolf and G. Eisenbrand, *Journal of Medicinal Chemistry*, 2017, **60**, 4949-4962.
- S194. Y. Fu, S. Tang, Y. Su, X. Lan, Y. Ye, C. Zha, L. Li, J. Cao, Y. Chen, L. Jiang, Y. Huang, J. Ding, M. Geng, M. Huang and H. Wan, *Bioorganic and Medicinal Chemistry Letters*, 2017, **27**, 5332-5336.
- S195. S. Kalra, G. Joshi, A. Munshi and R. Kumar, *European journal of medicinal chemistry*, 2017, **142**, 424-458.
- S196. Y. Li, Q. Guo, C. Zhang, Z. Huang, T. Wang, X. Wang, X. Wang, G. Xu, Y. Liu, S. Yang, Y. Fan and R. Xiang, *Bioorganic and Medicinal Chemistry Letters*, 2017, **27**, 3231-3237.
- S197. WO2017071516A1, 2017.
- S198. L. Munoz, *Nature Reviews Drug Discovery*, 2017, **16**, 424-440.
- S199. S. J. Park, E. Kim, M. Yoo, J. Y. Lee, C. H. Park, J. Y. Hwang and J. D. Ha, *Bioorganic and Medicinal Chemistry Letters*, 2017, **27**, 4399-4404.
- S200. Y. Shi, J. Park, C. Lagisetti, W. Zhou, L. C. Sambucetti and T. R. Webb, *Bioorganic and Medicinal Chemistry Letters*, 2017, **27**, 406-412.
- S201. Q. Z. Sun, G. F. Lin, L. L. Li, X. T. Jin, L. Y. Huang, G. Zhang, W. Yang, K. Chen, R. Xiang, C. Chen, Y. Q. Wei, G. W. Lu and S. Y. Yang, *Journal of Medicinal Chemistry*, 2017, **60**, 6337-6352.
- S202. M. P. Tantak, L. Klingler, V. Arun, A. Kumar, R. Sadana and D. Kumar, *European journal of medicinal chemistry*, 2017, **136**, 184-194.

- S203. S. Wang, L. Xu, Y. T. Lu, Y. F. Liu, B. Han, T. Liu, J. Tang, J. Li, J. Wu, J. Y. Li, L. F. Yu and F. Yang, *European journal of medicinal chemistry*, 2017, **130**, 195-208.
- S204. J. B. Xi, Y. F. Fang, B. Frett, M. L. Zhu, T. Zhu, Y. N. Kong, F. J. Guan, Y. Zhao, X. W. Zhang, H. Y. Li, M. L. Ma and W. Hu, *European journal of medicinal chemistry*, 2017, **126**, 1083-1106.
- S205. W. Zhu, H. Chen, Y. Wang, J. Wang, X. Peng, X. Chen, Y. Gao, C. Li, Y. He, J. Ai, M. Geng, M. Zheng and H. Liu, *Journal of Medicinal Chemistry*, 2017, **60**, 6018-6035.
- S206. S. B. Bharate, V. Kumar, S. K. Jain, M. J. Mintoo, S. K. Guru, V. K. Nuthakki, M. Sharma, S. S. Bharate, S. G. Gandhi, D. M. Mondhe, S. Bhushan and R. A. Vishwakarma, *Journal of Medicinal Chemistry*, 2018, **61**, 1664-1687.
- S207. S. Cherukupalli, G. A. Hampannavar, S. Chinnam, B. Chandrasekaran, N. Sayyad, F. Kayamba, R. Reddy Aleti and R. Karpoomath, *Bioorganic and Medicinal Chemistry*, 2018, **26**, 309-339.
- S208. X. Hu, H. Zhao, Y. Wang, Z. Liu, B. Feng and C. Tang, *Bioorganic and Medicinal Chemistry Letters*, 2018, **28**, 3385-3390.
- S209. R. Jorda, D. Hendrychova, J. Voller, E. Reznickova, T. Gucky and V. Krystof, *Journal of Medicinal Chemistry*, 2018, **61**, 9105-9120.
- S210. Y. Li, X. Luo, Q. Guo, Y. Nie, T. Wang, C. Zhang, Z. Huang, X. Wang, Y. Liu, Y. Chen, J. Zheng, S. Yang, Y. Fan and R. Xiang, *Journal of Medicinal Chemistry*, 2018, **61**, 3166-3192.
- S211. WO2018140730A1, 2018.
- S212. WO2018005533A1, 2018.
- S213. WO2018005860A1, 2018.
- S214. Y. Wang, Y. Chen, X. Cheng, K. Zhang, H. Wang, B. Liu and J. Wang, *Bioorganic and Medicinal Chemistry*, 2018, **26**, 3491-3501.
- S215. Y. Wang, W. J. Liu, L. Yin, H. Li, Z. H. Chen, D. X. Zhu, X. Q. Song, Z. Z. Cheng, P. Song, Z. Wang and Z. G. Li, *Bioorganic and Medicinal Chemistry Letters*, 2018, **28**, 974-978.
- S216. Y. Wang, Y. Zhi, Q. Jin, S. Lu, G. Lin, H. Yuan, T. Yang, Z. Wang, C. Yao, J. Ling, H. Guo, T. Li, J. Jin, B. Li, L. Zhang, Y. Chen and T. Lu, *Journal of Medicinal Chemistry*, 2018, **61**, 1499-1518.
- S217. L. Yin, H. Li, W. Liu, Z. Yao, Z. Cheng, H. Zhang and H. Zou, *European journal of medicinal chemistry*, 2018, **144**, 1-28.
- S218. M. Yoshikawa, M. Saitoh, T. Katoh, T. Seki, S. V. Bigi, Y. Shimizu, T. Ishii, T. Okai, M. Kuno, H. Hattori, E. Watanabe, K. S. Saikatendu, H. Zou, M. Nakakariya, T. Tatamiya, Y. Nakada and T. Yogo, *Journal of Medicinal Chemistry*, 2018, **61**, 2384-2409.
- S219. C. Zha, W. Deng, Y. Fu, S. Tang, X. Lan, Y. Ye, Y. Su, L. Jiang, Y. Chen, Y. Huang, J. Ding, M. Geng, M. Huang and H. Wan, *European journal of medicinal chemistry*, 2018, **148**, 140-153.
- S220. H. Zhao, X. Hu, K. Cao, Y. Zhang, K. Zhao, C. Tang and B. Feng, *European journal of medicinal chemistry*, 2018, **157**, 935-945.
- S221. Y. Zhi, B. Li, C. Yao, H. Li, P. Chen, J. Bao, T. Qin, Y. Wang, T. Lu and S. Lu, *European journal of medicinal chemistry*, 2018, **155**, 303-315.
- S222. E. M. H. Ali, M. S. Abdel-Maksoud and C. H. Oh, *Bioorganic and Medicinal Chemistry*, 2019, **27**, 1159-1194.
- S223. US20190144456A1, 2019.
- S224. P. A. Harris, N. Faucher, N. George, P. M. Eidam, B. W. King, G. V. White, N. A. Anderson, D. Bandyopadhyay, A. M. Beal, V. Beneton, S. B. Berger, N. Campobasso, S. Campos, C. A. Capriotti, J. A. Cox, A. Dagan, F. Donche, M. H. Fouchet, J. N. Finger, B. Geddes, P. J. Gough,

- P. Grondin, B. L. Hoffman, S. J. Hoffman, S. E. Hutchinson, J. U. Jeong, E. Jigorel, P. Lamoureux, L. K. Leister, J. D. Lich, M. K. Mahajan, J. Meslamani, J. E. Mosley, R. Nagilla, P. M. Nassau, S. L. Ng, M. T. Ouellette, K. K. Pasikanti, F. Potvain, M. A. Reilly, E. J. Rivera, S. Sautet, M. C. Schaeffer, C. A. Sehon, H. Sun, J. H. Thorpe, R. D. Totoritis, P. Ward, N. Wellaway, D. D. Wisnoski, J. M. Woolven, J. Bertin and R. W. Marquis, *Journal of Medicinal Chemistry*, 2019, **62**, 5096-5110.
- S225. H. Heng, Y. Zhi, H. Yuan, Z. Wang, H. Li, S. Wang, J. Tian, H. Liu, Y. Chen, T. Lu, T. Ran and S. Lu, *European journal of medicinal chemistry*, 2019, **163**, 195-206.
- S226. Z. Huang, B. Zhao, Z. Qin, Y. Li, T. Wang, W. Zhou, J. Zheng, S. Yang, Y. Shi, Y. Fan and R. Xiang, *European journal of medicinal chemistry*, 2019, **181**, 111541.
- S227. R. Jorda, L. Havlicek, A. Sturc, D. Tuskova, L. Daumova, M. Alam, J. Skerlova, M. Nekardova, M. Perina, T. Pospisil, J. Siroka, L. Urbanek, P. Pacht, P. Rezacova, M. Strnad, P. Klener and V. Krystof, *Journal of Medicinal Chemistry*, 2019, **62**, 4606-4623.
- S228. I. Khan, M. A. Shareef and C. G. Kumar, *European journal of medicinal chemistry*, 2019, **178**, 1-12.
- S229. H. Lei, N. Jiang, X. Miao, L. Xing, M. Guo, Y. Liu, H. Xu, P. Gong, D. Zuo and X. Zhai, *European journal of medicinal chemistry*, 2019, **171**, 297-309.
- S230. S. Narayan, S. Ramiseti, A. S. Jaiswal, B. K. Law, A. Singh-Pillay, P. Singh, S. Amin and A. K. Sharma, *European journal of medicinal chemistry*, 2019, **161**, 456-467.
- S231. M. Poratti and G. Marzaro, *European journal of medicinal chemistry*, 2019, **172**, 143-153.
- S232. C. Sánchez-Martínez, M. J. Lallena, S. G. Sanfeliciano and A. de Dios, *Bioorganic and Medicinal Chemistry Letters*, 2019, **29**, 126637.
- S233. C. Shi, Q. Wang, X. Liao, H. Ge, G. Huo, L. Zhang, N. Chen, X. Zhai, Y. Hong, L. Wang, Y. Han, W. Xiao, Z. Wang, W. Shi, Y. Mao, J. Yu, G. Xia and Y. Liu, *European journal of medicinal chemistry*, 2019, **178**, 352-364.
- S234. V. Sonawane, M. U. Mohd Siddique, S. S. Jadav, B. N. Sinha, V. Jayaprakash and B. Chaudhuri, *European journal of medicinal chemistry*, 2019, **165**, 115-132.
- S235. S. Tadesse, E. C. Caldon, W. Tilley and S. Wang, *Journal of Medicinal Chemistry*, 2019, **62**, 4233-4251.
- S236. Y. Teng, K. Lu, Q. Zhang, L. Zhao, Y. Huang, A. M. Ingarra, H. Galons, T. Li, S. Cui, P. Yu and N. Oumata, *European journal of medicinal chemistry*, 2019, **183**, 111641.
- S237. M. G. Thomas, M. De Rycker, M. Ajakane, S. Albrecht, A. I. Alvarez-Pedraglio, M. Boesche, S. Brand, L. Campbell, J. Cantizani-Perez, L. A. T. Cleghorn, R. C. B. Copley, S. D. Crouch, A. Daugan, G. Drewes, S. Ferrer, S. Ghidelli-Disse, S. Gonzalez, S. L. Gresham, A. P. Hill, S. J. Hindley, R. M. Lowe, C. J. MacKenzie, L. MacLean, S. Manthri, F. Martin, J. Miguel-Siles, V. L. Nguyen, S. Norval, M. Osuna-Cabello, A. Woodland, S. Patterson, I. Pena, M. T. Quesada-Campos, I. H. Reid, C. Revill, J. Riley, J. R. Ruiz-Gomez, Y. Shishikura, F. R. C. Simeons, A. Smith, V. C. Smith, D. Spinks, L. Stojanovski, J. Thomas, S. Thompson, T. Underwood, D. W. Gray, J. M. Fiandor, I. H. Gilbert, P. G. Wyatt, K. D. Read and T. J. Miles, *Journal of Medicinal Chemistry*, 2019, **62**, 1180-1202.
- S238. X. Wang, C. Yu, C. Wang, Y. Ma, T. Wang, Y. Li, Z. Huang, M. Zhou, P. Sun, J. Zheng, S. Yang, Y. Fan and R. Xiang, *European journal of medicinal chemistry*, 2019, **181**, 111535.
- S239. T. Yang, M. Hu, W. Qi, Z. Yang, M. Tang, J. He, Y. Chen, P. Bai, X. Yuan, C. Zhang, K. Liu, Y. Lu, M. Xiang and L. Chen, *Journal of Medicinal Chemistry*, 2019, **62**, 10305-10320.

- S240. L. Zhao, Y. Li, Y. Wang, Z. Qiao, Z. Miao, J. Yang, L. Huang, C. Tian, L. Li, D. Chen and S. Yang, *Journal of Medicinal Chemistry*, 2019, **62**, 10691-10710.
- S241. L. Zhao, X. Yuan, J. Wang, Y. Feng, F. Ji, Z. Li and J. Bian, *Bioorganic and Medicinal Chemistry*, 2019, **27**, 677-685.
- S242. A. I. de Lucas, J. A. Vega, E. Matesanz, M. L. Linares, A. Garcia Molina, G. Tresadern, H. Lavreysen, A. A. Trabanco and J. M. Cid, *ACS Medicinal Chemistry Letters*, 2020, **11**, 303-308.
- S243. A. Y. Moussa, N. M. Mostafa and A. N. B. Singab, *Nature Reviews Drug Discovery*, 2020, **34**, 2715-2722.
- S244. W. F. Tear, S. Bag, R. Diaz-Gonzalez, G. Ceballos-Perez, D. I. Rojas-Barros, C. Cordon-Obras, G. Perez-Moreno, R. Garcia-Hernandez, M. S. Martinez-Martinez, L. M. Ruiz-Perez, F. Gamarro, D. Gonzalez Pacanowska, C. R. Caffrey, L. Ferrins, P. Manzano, M. Navarro and M. P. Pollastri, *Journal of Medicinal Chemistry*, 2020, **63**, 756-783.
- S245. WO2020140927A1, 2020.
- S246. M. Yousuf, A. Shamsi, P. Khan, M. Shahbaaz, M. F. AlAjmi, A. Hussain, G. M. Hassan, A. Islam, Q. M. Rizwanul Haque and M. I. Hassan, *International Journal of Molecular Sciences*, 2020, **21**, 3526.
- S247. Y. Li, R. Du, Y. Nie, T. Wang, Y. Ma and Y. Fan, *Bioorganic Chemistry*, 2021, **109**, 104717.
- S248. H. Shan, X. Ma, G. Yan, M. Luo, X. Zhong, S. Lan, J. Yang, Y. Liu, C. Pu, Y. Tong and R. Li, *European journal of medicinal chemistry*, 2021, **219**, 113432.
- S249. X. Shi, Y. Quan, Y. Wang, Y. Wang and Y. Li, *Bioorganic and Medicinal Chemistry Letters*, 2021, **33**, 127725.
